# Supplementary material for: Innate immune sensor LGP2 is cleaved by the Leader protease of foot-and-mouth disease virus
Source: PubMed Central journal article supplement (PMC6042790; doi:10.1371/journal.ppat.1007135), 2018-06-29

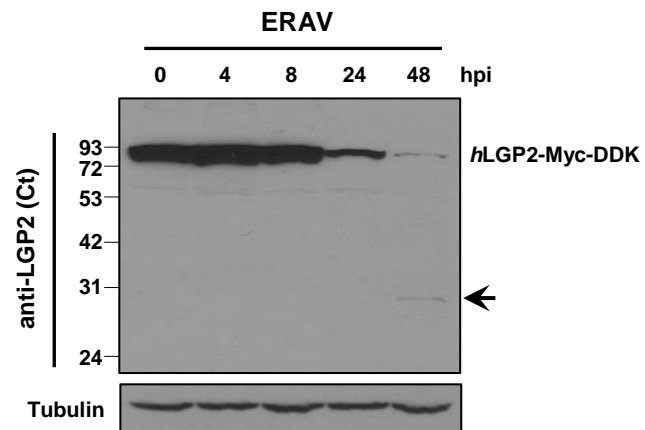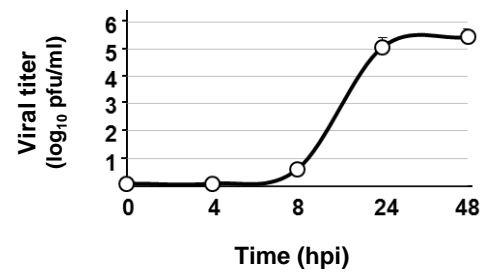

Supplement: ppat.1007135.s003.pdf [file ppat.1007135.s003.pdf]
